# Supplementary material for: The monohydrate and dihydrate of acetic acid: A high-resolution microwave spectroscopic study
Source: Royal Society of Chemistry journal article supplement (doi:10.1039/b814562h), 2008-11-05
Supplement: b814562h.pdf [file b814562h.pdf]

# The Mono- and Di-hydrates of Acetic Acid: A High-resolution Microwave Spectroscopic Study

Bin Ouyang and Brian J. Howard\*

*Physical and Theoretical Chemistry Laboratory, Department of Chemistry, South Parks Road,  
University of Oxford, Oxford OX1 3QZ, United Kingdom*

## Supplementary Data

### A. Cartesian coordinates

Table S.1-S.2 show the cartesian coordinates of atoms of the fully optimized ACE-(H<sub>2</sub>O) and ACE-(H<sub>2</sub>O)<sub>2</sub> in their principal axis systems on the level of MP2/6-311++G(2df,2pd) calculations.

Table S.1: Cartesian coordinates of atoms in ACE-(H<sub>2</sub>O) in its principal axis system from MP2/6-311++G(2df,2pd) calculation.

|   | <i>a</i> | <i>b</i> | <i>c</i> |
|---|----------|----------|----------|
| C | 2.1840   | -0.0322  | 0.0166   |
| C | 0.6929   | 0.0849   | 0.0077   |
| O | 0.0989   | -1.1136  | 0.0188   |
| H | -0.8714  | -0.9675  | 0.0271   |
| O | 0.0833   | 1.1390   | 0.0143   |
| H | 2.5181   | -0.6144  | 0.8386   |
| H | 2.6314   | 0.9538   | 0.0012   |
| H | 2.4888   | -0.5657  | -0.9139  |
| O | -2.4523  | -0.0404  | -0.0628  |
| H | -1.8786  | 0.7380   | 0.0023   |
| H | -3.1145  | 0.0660   | 0.6219   |

---

\* Author to whom correspondence should be addressed. FAX: +44 1865 275410. E-mail: brian.howard@chem.ox.ac.uk

Table S.2: Cartesian coordinates of atoms in ACE-(H<sub>2</sub>O)<sub>2</sub> in its principal axis system from MP2/6-311++G(2df,2pd) calculation.

|   | <i>a</i> | <i>b</i> | <i>c</i> |
|---|----------|----------|----------|
| C | 2.6974   | -0.2500  | 0.0084   |
| C | 1.2061   | -0.1147  | -0.0017  |
| O | 0.8216   | 1.1548   | 0.0141   |
| H | -0.1672  | 1.2198   | 0.0003   |
| O | 0.4416   | -1.0657  | -0.0024  |
| H | 2.9745   | -1.2969  | 0.0102   |
| H | 3.1109   | 0.2463   | -0.8663  |
| H | 3.1012   | 0.2479   | 0.8866   |
| H | -1.3811  | -1.3385  | 0.0240   |
| O | -2.3484  | -1.2464  | 0.0693   |
| H | -2.6915  | -1.8304  | -0.6081  |
| H | -2.2550  | 0.5525   | -0.0414  |
| O | -1.8678  | 1.4475   | -0.0671  |
| H | -2.3041  | 1.9369   | 0.6316   |

## B. Observed Transitions of $A$ and $E$ states of ACE-(H<sub>2</sub>O)

Table S.3: Fit to the observed transitions of  $A$  and  $E$  states of ACE-(H<sub>2</sub>O).

| Transition                         | $\nu_{\text{obs}}^a/\text{MHz}$ |            | $\Delta\nu_{\text{SPFIT}}^b/\text{MHz}$ |         | $\Delta\nu_{\text{XIAM}}^c/\text{MHz}$ |         |
|------------------------------------|---------------------------------|------------|-----------------------------------------|---------|----------------------------------------|---------|
|                                    | $A$                             | $E$        | $A$                                     | $E$     | $A$                                    | $E$     |
| 2 <sub>1,2</sub> ←1 <sub>1,1</sub> | 8967.2202                       | 9294.8626  | 0.0035                                  | 0.0059  | 0.0010                                 | 0.0101  |
| 2 <sub>0,2</sub> ←1 <sub>0,1</sub> | 9406.2866                       | 9405.5812  | 0.0010                                  | 0.0009  | -0.0002                                | 0.0006  |
| 2 <sub>1,1</sub> ←1 <sub>1,0</sub> | 9880.7641                       | 9552.9173  | 0.0001                                  | 0.0010  | -0.0005                                | 0.0012  |
| 3 <sub>1,3</sub> ←2 <sub>1,2</sub> | 13439.8984                      | 13747.6331 | 0.0016                                  | 0.0053  | -0.0009                                | 0.0115  |
| 3 <sub>0,3</sub> ←2 <sub>0,2</sub> | 14065.2292                      | 14062.9384 | -0.0054                                 | -0.0026 | -0.0055                                | -0.0083 |
| 3 <sub>2,2</sub> ←2 <sub>2,1</sub> | 14135.8498                      | 14174.9172 | 0.0019                                  | -0.0055 | 0.0017                                 | 0.0008  |
| 3 <sub>2,1</sub> ←2 <sub>2,0</sub> | 14206.5362                      | 14169.1290 | -0.0040                                 | 0.0013  | -0.0084                                | 0.0017  |
| 3 <sub>1,2</sub> ←2 <sub>1,1</sub> | 14809.7598                      | 14501.1863 | 0.0050                                  | -0.0009 | 0.0051                                 | -0.0065 |
| 1 <sub>1,0</sub> ←1 <sub>0,1</sub> | 9055.8936                       | 10193.9641 | -0.0003                                 | 0.0079  | 0.0016                                 | 0.0032  |
| 1 <sub>1,1</sub> ←0 <sub>0,0</sub> | 13311.1282                      | -          | -0.0029                                 | -       | -0.0030                                | -       |
| 1 <sub>1,0</sub> ←0 <sub>0,0</sub> | -                               | 14905.8587 | -                                       | -0.0013 | -                                      | -0.0020 |
| 2 <sub>1,1</sub> ←2 <sub>0,2</sub> | 9530.3733                       | 10341.2847 | 0.0010                                  | -0.0075 | 0.0035                                 | -0.0116 |
| 3 <sub>1,2</sub> ←3 <sub>0,3</sub> | 10274.8859                      | 10779.5624 | -0.0066                                 | 0.0240  | -0.0039                                | 0.0200  |
| 4 <sub>0,4</sub> ←3 <sub>1,3</sub> | 11137.4698                      | 12001.9908 | -0.0009                                 | 0.0010  | 0.0051                                 | -0.0026 |
| 4 <sub>1,3</sub> ←4 <sub>0,4</sub> | 11327.1882                      | 11617.3009 | 0.0039                                  | -0.0055 | 0.0055                                 | -0.0080 |
| 5 <sub>1,4</sub> ←5 <sub>0,5</sub> | 12733.3782                      | 12892.2752 | 0.0127                                  | -0.0178 | 0.0121                                 | -0.0167 |
| 6 <sub>1,5</sub> ←6 <sub>0,6</sub> | 14541.9676                      | 14625.0445 | -0.0087                                 | 0.0106  | 0.0131                                 | -0.0020 |

<sup>a</sup>  $\nu_{\text{obs}}$  of the transitions are the intensity-weighted average frequencies of hyperfine splittings of the order of 20–120 kHz.

<sup>b</sup>  $\Delta\nu_{\text{SPFIT}} = \nu_{\text{obs}} - \nu_{\text{calc,SPFIT}}$ .

<sup>c</sup>  $\Delta\nu_{\text{XIAM}} = \nu_{\text{obs}} - \nu_{\text{calc,XIAM}}$ .

## C. Observed Transitions of $A$ and $E$ states of ACE-(H<sub>2</sub>O)<sub>2</sub>

Table S.4: List of observed transitions of *A* and *E* states of ACE-(H<sub>2</sub>O)<sub>2</sub>.

| Transition                         | $\nu_{\text{obs}}^a/\text{MHz}$ |            | $\Delta\nu_{\text{SPFIT}}^b/\text{MHz}$ |          | $\Delta\nu_{\text{XIAM}}^c/\text{MHz}$ |          |
|------------------------------------|---------------------------------|------------|-----------------------------------------|----------|----------------------------------------|----------|
|                                    | <i>A</i>                        | <i>E</i>   | <i>A</i>                                | <i>E</i> | <i>A</i>                               | <i>E</i> |
| 3 <sub>1,3</sub> ←2 <sub>1,2</sub> | 7800.7853                       | 7947.0258  | -0.0005                                 | 0.0004   | -0.0026                                | -0.0025  |
| 3 <sub>0,3</sub> ←2 <sub>0,2</sub> | 8286.0733                       | 8280.7742  | 0.0013                                  | -0.0016  | 0.0003                                 | 0.0009   |
| 3 <sub>1,2</sub> ←2 <sub>1,1</sub> | 9054.2784                       | 8906.3055  | 0.0000                                  | 0.0012   | -0.0022                                | 0.0013   |
| 4 <sub>1,4</sub> ←3 <sub>1,3</sub> | 10357.0658                      | 10433.4980 | 0.0007                                  | 0.0001   | -0.0011                                | -0.0014  |
| 4 <sub>0,4</sub> ←3 <sub>0,3</sub> | 10868.8808                      | 10858.6329 | 0.0006                                  | -0.0026  | 0.0028                                 | -0.0022  |
| 4 <sub>2,3</sub> ←3 <sub>2,2</sub> | 11239.0536                      | 11439.5078 | 0.0027                                  | -0.0017  | 0.0037                                 | 0.0070   |
| 4 <sub>2,2</sub> ←3 <sub>2,1</sub> | 11642.5860                      | 11449.9794 | -0.0006                                 | -0.0018  | -0.0007                                | -0.0076  |
| 4 <sub>1,3</sub> ←3 <sub>1,2</sub> | 12015.6353                      | 11934.8160 | -0.0003                                 | -0.0015  | -0.0016                                | -0.0013  |
| 5 <sub>1,5</sub> ←4 <sub>1,4</sub> | 12882.9759                      | 12921.9811 | 0.0008                                  | 0.0018   | 0.0003                                 | 0.0020   |
| 5 <sub>0,5</sub> ←4 <sub>0,4</sub> | 13342.8559                      | 13327.8744 | -0.0007                                 | 0.0025   | 0.0059                                 | -0.0035  |
| 5 <sub>2,4</sub> ←4 <sub>2,3</sub> | 13995.4410                      | 14289.1762 | 0.0020                                  | 0.0011   | 0.0024                                 | 0.0000   |
| 5 <sub>2,3</sub> ←4 <sub>2,2</sub> | 14742.0561                      | 14459.1446 | -0.0008                                 | 0.0011   | 0.0034                                 | 0.0050   |
| 5 <sub>1,4</sub> ←4 <sub>1,3</sub> | 14920.0789                      | 14872.6183 | 0.0004                                  | 0.0021   | 0.0014                                 | 0.0016   |
| 6 <sub>0,6</sub> ←5 <sub>0,5</sub> | 15739.6353                      | 15722.4168 | -0.0006                                 | 0.0030   | -0.0065                                | 0.0026   |
| 6 <sub>1,6</sub> ←5 <sub>1,5</sub> | 15378.6718                      | 15398.3503 | -0.0005                                 | -0.0009  | 0.0017                                 | 0.0011   |
| 6 <sub>2,5</sub> ←5 <sub>2,4</sub> | 16717.2575                      | -          | -0.0030                                 | -        | -0.0036                                | -        |

<sup>a</sup>  $\Delta\nu_{\text{SPFIT}} = \nu_{\text{obs}} - \nu_{\text{calc,SPFIT}}$ .

<sup>b</sup>  $\Delta\nu_{\text{XIAM}} = \nu_{\text{obs}} - \nu_{\text{calc,XIAM}}$ .
